# Supplementary material for: Formation of polypyrrole from 2,5-bis(2-pyrrolyl)pyrrolidineElectronic supplementary information (ESI) available: details of the synthesis of 2,5-bis(2-pyrrolyl)pyrrolidine and polypyrrole. See http://www.rsc.org/suppdata/cc/b3/b312660a/
Source: Royal Society of Chemistry journal article supplement (doi:10.1039/b312660a), 2004-01-01
Supplement: b312660a.doc [file b312660a.doc]

# Supplementary Information

## Formation of Polypyrrole from 2,5-bis(2-pyrrolyl)-pyrrolidine

Arnd Garsuch, Rita R. Sattler, Peter G. Pickup

Department of Chemistry, Memorial University of Newfoundland, St. John’s, Newfoundland. CANADA A1B 3X7

### Synthesis of 2,5-bis(2-pyrrolyl)-pyrrolidine

The procedure described by Potts and Smith1 was followed. Pyrrole (24.6 g) was added to rapidly stirred 20 % HCl(aq) (100 ml) in an ice bath. After 1 min, concentrated ammonia (100 ml) was poured into the solution followed by extraction with ether. 2,5-bis(2-pyrrolyl)-pyrrolidine was isolated in ca. 20 % yield following removal of the solvent.

1H NMR (CDCl3, 500 Hz): δ(ppm) = 1.98 (m, 2H), 2.21 (m, 1H, NH), 2.30 (m, 2H), 4.37 (m, 2H), 6.04 (s, 2H), 6.17 (m, 2H), 6.71 (m, 2H) 8.58 (s, 2H, NH). The pyrrole CH resonances were not sufficiently resolved to obtain coupling constants.

**Synthesis of polypyrrole**

A solution of FeCl3 (4 mg) in 20 % HCl(aq) (40 mL) was stirred under nitrogen and 2,5-bis(2-pyrrolyl)-pyrrolidine (160 mg) was added. After 12 h the polypyrrole was collected by filtration, washed with deionized water, and dried over P2O5. Yield 60 %; elemental analysis: 51.40 % C, 6.11 % H, 11.45 % N; calculated 50.27 % C, 6.12 % H, 14.66 % N for C4H3N(FeCl4-)0.14·1.4 H2O.

# Reference

1. H.A. Potts and G.F. Smith, *J. Chem. Soc. (C)*, 1957, 4018.
